# Supplementary material
Source: HighWire-hosted journal article supplement (https://www.cmajopen.ca/highwire/filestream/84943/field_highwire_adjunct_files/4/CMAJOpen-2020-0077-3-at.pdf)
Supplement: CMAJOpen-2020-0077-3-at.pdf [file CMAJOpen-2020-0077-3-at.pdf]

## **NARRATIVE DESCRIPTION OF REACTIONS TO OPC**

### **Reaction #1**

Patient A was a 3 year-old male who presented with history of maculopapular rash that onset 3 days after starting amoxicillin for acute otitis media at age 16 months. He had neither a personal history of immediate reaction nor parental history of amoxicillin allergy. There were no other documented allergies.

During the challenge, he developed urticaria on the face and the trunk 20 minutes following exposure to the initial amoxicillin dose of 50mg. He was treated with diphenhydramine 18mg, and the urticaria resolved within 20 minutes.

### **Reaction #2**

Patient B was an 8 year-old female who presented with a history of maculopapular rash that worsened 2 days after starting amoxicillin for acute otitis media and pharyngitis at age 14 months. Clinicians suspected roseola vs. drug allergy. She had no personal history of immediate reaction. She also had an allergy to clarithromycin. Both of her parents had documented history of amoxicillin allergy.

During the challenge, she developed a sensation of swollen and sore throat 45 minutes following exposure to the second amoxicillin dose of 450mg, and then sensation of itching of the lips at 75 minutes. She was treated with diphenhydramine 12.5mg, and symptoms improved within 25 minutes.

### **Reaction #3**

Patient C was a 9 year-old female who presented with history of maculopapular rash and sore throat that onset after the third dose of amoxicillin for pharyngitis at age 6 years. She had neither a personal history of immediate reaction nor parental history of amoxicillin allergy. There were no other documented allergies.

During the challenge, she developed urticaria on the neck and right flank and pruritus 27 minutes following exposure to the initial amoxicillin dose of 50mg. She was treated with diphenhydramine 25mg, and the pruritus resolved within 30 minutes.
